# Supplementary material for: The UK Paediatric Familial Hypercholesterolaemia Register: preliminary data
Source: PubMed Central journal article supplement (PMC5339547; doi:10.1136/archdischild-2015-308570), 2016-03-06

## Appendix 1

**Development of the paediatric register:** A steering committee was set up to develop the Paediatric register, including a patient representative, adult and child physicians and representatives of Heart UK, British Heart Foundation, British Inherited Metabolic Disease Group and the Royal College of Paediatrics and Child Health, all of whom endorsed the Register. A Clinical Champion was appointed in May 2012. The Register aims to collect information on the baseline characteristics of the children and to monitor the effects of current and new treatments on growth, puberty, routine biochemistry and to provide comparative audit and long term safety data, and anonymised data for research. Patient information sheets, age specific consents and assents, and parent information leaflets were developed and are available from the authors on request.

**Contacting clinicians:** To enrol patients to the Paediatric FH register, each centre was provided with a centre specific code and password. The local server and administrative team provided technical support. Clinical queries were addressed to the clinical champion. Newsletters and steering group meetings communicated updates and progress.

### FH Paediatric Register Data Items

#### DEMOGRAPHIC

Site code  
Patient audit no.  
NHS Number  
Hospital Number  
Postcode  
Patient Last name  
Patient First name  
Last edited  
Dob  
Gender  
Consent  
Clinic type  
Ethnic group  
Status (IN DATABASE)

#### DIAGNOSIS\*

What is the patient's diagnosis?  
Year of diagnosis?  
What were the lipid and lipoprotein measurements used to make the diagnosis?  
Height (cm)?  
Weight (kg)?  
Birth-weight  
Gestational Age at birth  
Does the patient have a history of CHD?  
If yes this is substantiated by

- Angiogram
- Exercise ECG
- Other

Details of affected parent/relative (fill in only for affected relatives)  
Does the child have the clinical sign of:

- Corneal arcus
- Tendon xanthoma

Has a family mutation has been found?  
What is the family mutation, if known?  
If the family mutation is known has the child been offered a DNA test?

Month and Year when offered

**ASSESSMENT AND TREATMENT\***

What was the date of the patient's last (most recent outpatient clinic appointment)?

At the latest clinic what was the patient's height and weight?

What were the most recent lipid and lipoprotein measurements?

Patient on ANY lipid lowering treatment medication?

If patient is currently on lipid lowering treatment when was this commenced?

(If applicable) Please indicate the reason(s) that this patient is not receiving statin.

*More than one option may be selected*

- Patient intolerant to statin
- Patient/parent /carer declined
- Child under 10 years
- Child 10 and over but risk low
- Other, please list:  
What was the patient's treatment at the time of the results?

- Statin:
  - Atorvastatin      Yes No    Dose:
  - Fluvastatin        Yes No    Dose:
  - Pravastatin        Yes No    Dose:
  - Rosuvastatin      Yes No    Dose:
  - Simvastatin        Yes No    Dose:

- Patient no receiving statin:  
Is the patient receiving any other lipid lowering treatment?

*Only answer questions 2.7 (c-i) if answer to 2.6 is 'yes'.*

- Resin
- Ezetimibe
- Fenofibrate
- Other, please list:  
Plasma LDL-C apheresis

If the following were measured before initiation of statin treatment please provide levels:

- No measurements taken
- Date of measure
- creatine kinase
- ALT
- AST

If the following were measured after initiation of statin treatment please provide levels:

- No measurements taken
- Date of measure
- creatine kinase
- ALT
- AST

**LIFESTYLE\***

Is the patient a smoker?

If yes, age when they started?

If yes, how many a day do they smoke?

If the patient is female have they started menstruating?

If yes, age at first period?

If yes, are they taking an oral contraceptive?

**Fields in Assessment and Treatment and Lifestyle REPEATED FOR EACH UPDATE\***

Date of appointment

\*Not available option for each question

In 2011, during the development of the Register, it was decided that detailed dietetic data would not be included as a data field, as the dietary management of FH is not standardised and would be beyond the scope of this register.

## Appendix 2 – List of Centres Registering Data

|        |          |           |                                 |
|--------|----------|-----------|---------------------------------|
| Dr     | Maurice  | O'Kane    | Altnagelvin Area Hospital       |
| Dr     | Saikat   | Santra    | Birmingham Children's Hospital  |
| Dr     | Graham   | Bayly     | Bristol Royal Infirmary         |
| Dr     | Paul     | Masters   | Chesterfield Royal Hospital     |
| Dr     | Peter    | Sharpe    | Craigavon Area Hospital         |
| Dr     | Ruth     | Ayling    | Derriford Hospital              |
| Dr     | Tim      | Wang      | Frimley Park Hospital           |
| Dr     | Gwyneth  | Owen      | Glangwili Hospital              |
| Dr     | Kok-Swee | Gan       | Gloucestershire Royal Hospital  |
| Prof   | Tim      | Aitman    | Hammersmith Hospital            |
| Dr     | Mahmoud  | Barbir    | Harefield Hospital              |
| Dr     | Rochin   | Patle     | Medway Maritime Hospital        |
| Dr     | Steve    | Jones     | Pinderfields Hospital           |
| Dr     | Nirupa   | D'Souza   | Princess of Wales Hospital      |
| Dr     | Nigel    | Capps     | Princess Royal Hospital         |
| Dr     | Nicola   | Pritchard | Royal Berkshire Hospital        |
| Dr     | Paul     | Munyard   | Royal Cornwall Hospital         |
| Dr     | D R      | Nair      | Royal Free London               |
| Dr     | Andrew   | Taylor    | Royal United Hospital Bath      |
| Sister | Liz      | Higginson | Russells Hall Hospital, Dudley  |
| Dr     | Inessa   | Tracey    | Sandwell General Hospital       |
| Dr     | Andar    | Gunneberg | Swansea Hospital                |
| Dr     | Aabha    | Sharma    | Torbay Hospital                 |
| Dr     | Yvette   | Lolin     | Tunbridge Wells Hospital        |
| Dr     | Peter    | Dale      | University Hospital of Wales    |
| Dr     | Nikki    | Davis     | University Hospital Southampton |
| Dr     | Yee Ping | Teoh      | Wrexham Maelor Hospital         |

### Appendix 3 Supplementary Tables and Figures

**Supplementary Figure 1.** Correlation between Total and LDL-C measured at diagnosis and age, in those who subsequently did or did not receive statin treatment.

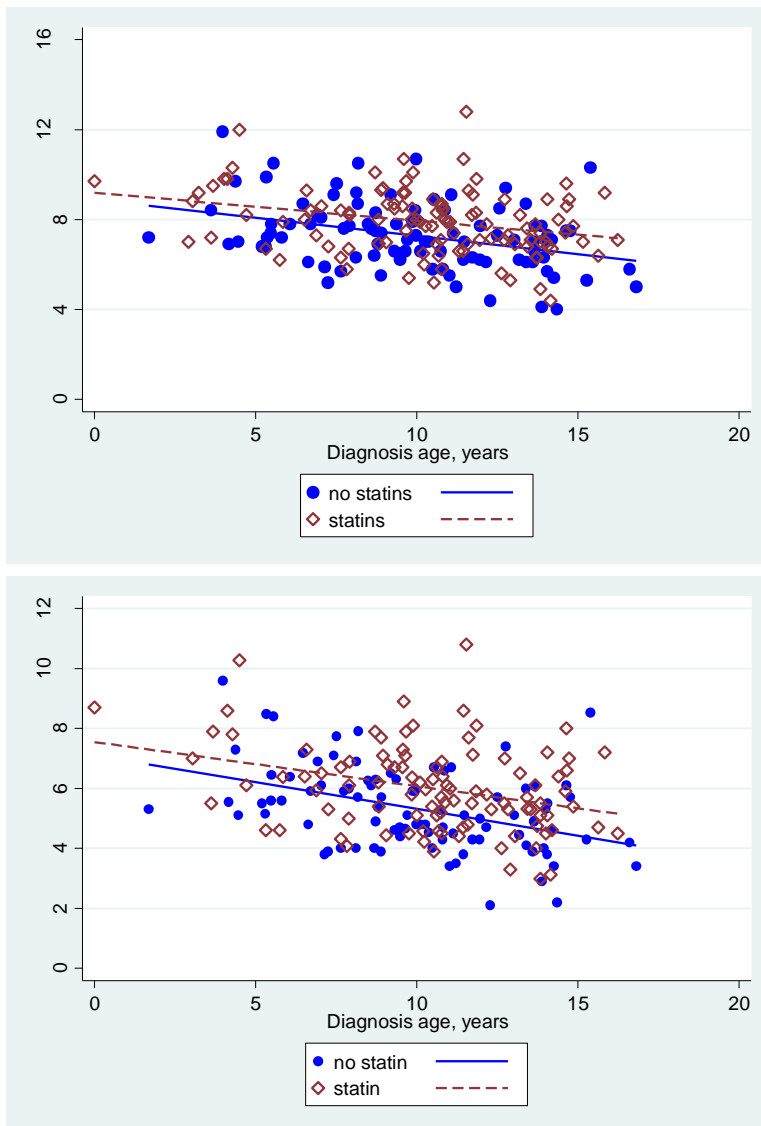

**Supplementary Table 1** Correlation between diagnostic TC and age and diagnostic LDL-C and age

|                 | Association with TC                            | P value statin vs. no statin |                 | Association with LDL-C                         | P value statin vs. no statin |
|-----------------|------------------------------------------------|------------------------------|-----------------|------------------------------------------------|------------------------------|
| No statin at FU | R=-0.36<br>B(se)= -0.16 (0.04)<br>P=0.0003     | P=0.53                       | No statin at FU | R=-0.42<br>B(se)= -0.18 (0.04)<br>P=0.00003    | P=0.60                       |
| Statins at FU   | R=-0.29<br>B(se)= -0.12 (0.04)<br>P=0.002      |                              | Statin at FU    | R=-0.32<br>B(se)= -0.15 (0.04)<br>P=0.001      |                              |
| ALL             | R=-0.30<br>B(se)= -0.14 (0.03)<br>P= 8.420e-06 |                              | ALL             | R=-0.34<br>B(se)= -0.15 (0.03)<br>P= 1.417e-06 |                              |

**Supplementary Table 2: Hazard ratios from Cox proportional hazards models for time to statin prescription with adjustment for age at diagnosis.**

| Variable                                |                             | HR (95% CI)<br>adjusted for age at<br>diagnosis | P value                | Number in<br>model/Number<br>on statins |
|-----------------------------------------|-----------------------------|-------------------------------------------------|------------------------|-----------------------------------------|
| Age (years)                             | 1 year increase             | 1.16 (1.09-1.24)                                | 3.0 x 10 <sup>-6</sup> | 200/104                                 |
| Sex                                     | M:F                         | 1.20 (0.81-1.78)                                | 0.36                   | 200/104                                 |
| Ethnicity                               | Non Caucasian:<br>Caucasian | 0.84 (0.51-1.41)                                | 0.51                   | 200/104                                 |
| CHD in parent/ first<br>degree relative | Yes:No                      | 1.06 (0.69-1.64)                                | 0.78                   | 198/102                                 |
| CHD in any relative                     | Yes:No                      | 1.05 (0.71-1.55)                                | 0.82                   | 205/108                                 |
| Mutation status                         | Yes:No                      | 1.23 (0.79-1.89)                                | 0.36                   | 179/97                                  |
| Weight (kg)                             | Per 1 SD increase           | 0.76 (0.52-1.12)                                | 0.17                   | 183/93                                  |
| Height (m)                              | Per 1 SD increase           | 0.68 (0.42-1.11)                                | 0.12                   | 164/83                                  |
| Total Cholesterol<br>(mmol/L)           | Per 1 SD increase           | 1.52 (1.26-1.84)                                | 0.00002                | 200/104                                 |
| HDL-C (mmol/L)                          | Per 1 SD increase           | 1.04 (0.84-1.28)                                | 0.73                   | 186/97                                  |
| Triglyceride (mmol/L)                   | Per 1 SD increase           | 1.08 (0.89-1.31)                                | 0.44                   | 183/96                                  |
| LDL-C (mmol/L)                          | Per 1 SD increase           | 1.59 (1.28-1.96)                                | 0.00002                | 186/95                                  |

This model excludes 5 who were on statins at diagnosis and 2 with missing dates for statin commencement.

**Supplementary Table 3 Lipid Lowering treatment in Children with FH**

| Drug                           | % on drug (N)                                                                                        | Dose | % on dose(N) |
|--------------------------------|------------------------------------------------------------------------------------------------------|------|--------------|
| Statin                         | 47.8% (111)                                                                                          | 5    | 3.6% (4)     |
|                                |                                                                                                      | 10   | 63.1% (70)   |
|                                |                                                                                                      | 20   | 27.0% (30)   |
|                                |                                                                                                      | 30   | 1.8% (2)     |
|                                |                                                                                                      | 40   | 4.5% (5)     |
|                                | Atorvastatin 48.7% (54)<br>Pravastatin 28.8% (32)<br>Rosuvastatin 2.7% (3)<br>Simvastatin 19.8% (22) |      |              |
| Resin-Cholestyramine           | 3.7% (4)                                                                                             | 4    | 50.0% (2)    |
|                                |                                                                                                      | 8    | 25.0% (1)    |
|                                |                                                                                                      | 12   | 25.0% (1)    |
| Ezetimibe                      | 0.9% (1)                                                                                             | 10   | 100% (1)     |
| Fenofibrate                    | 0 (0)                                                                                                | -    | -            |
| other (Benecol, plant stannol) | 1.8% (2)                                                                                             | -    | -            |

The commonly used statins were atorvastatin (48.7%; n=54; pravastatin (28.8%, n=32); rosuvastatin (2.7%; n=3) and simvastatin (19.8%; n=22). There was no significant difference in age at treatment ( $p=0.28$ ) in those on different statins (means (ranges) for age at last visit; pravastatin 12.9 (7-16), atorvastatin 14.0 (2-20) and simvastatin 13.6 (4-19). A small proportion of patients were on resins (<5%) and one patient was reported to be on ezetimibe. No patients were on fibrates and the use of plant stanols was limited (1.8%, n=2).

**Supplementary Table 4 Markers of statin damage by statin use**

| Follow up levels                      |              | No N=121      | Yes N=111        | P value (Mann-Whitney) |
|---------------------------------------|--------------|---------------|------------------|------------------------|
| Creatine Kinase (CK) U/L;             | Mean (SD)    | 144 (33.9) 2  | 123.3 (56.2) 76  | 0.33                   |
|                                       | Median [IQR] | 144 [120-168] | 107 [86.5-147.5] |                        |
| Alanine Amino Transferase (ALT) U/L   | Mean (SD)    | 14.3 (4.8) 4  | 19.7 (8.3) 101   | 0.15                   |
|                                       | Median [IQR] | 14 [10.5-18]  | 17 [14-22]       |                        |
| Aspartate Amino Transferase (AST) U/L | Mean (SD)    | 25 (6.7) 4    | 25.6 (5.8) 26    | 0.74                   |
|                                       | Median [IQR] | 23.5 [20-30]  | 26.5 [22-29]     |                        |

For toxicity reporting in paediatric studies, the Common Terminologies Criteria for Adverse Events (CTCAE) guidelines are used, which do not discriminate between paediatric and adult subjects and determine the toxicity level of ALT/AST and CK rise as a factor of ULN (CTCAE guidelines, 2003). CTCAE grading of toxicity for LFTs is defined as follows: Grade 1 values > 2.5 x Upper Limit of Normal (ULN); Grade 2: < 2.5 to 5 x ULN; grade 3 > 5 to 20 x ULN; Grade 4 > 20 x ULN; Grade 5 death. Some paediatric studies have used ALT/ALT > 250 IU/L as criteria for toxicity. CPK: grade 1 2.5 x ULN; Grade 2 > 2.5 x ULN; Grade 3 > 5 x ULN; Grade 4 > 10 x ULN; Grade 5 death.

Cancer Therapy Evaluation Program, Common Terminology Criteria for Adverse Events, Version 3.0, DCTD, NCI, NIH, DHHS March 31, 2003 (<http://ctep.cancer.gov>), Publish Date: August 9, 2006

## Supplementary Figure 2

### AST level (N=26) post statin treatment

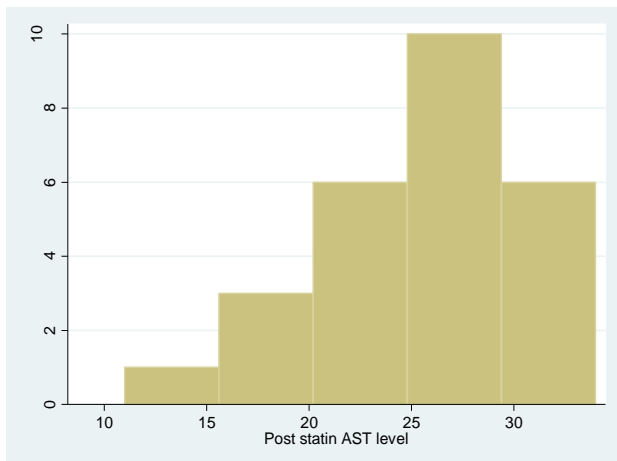

### ALT levels post statin treatment (n=101)

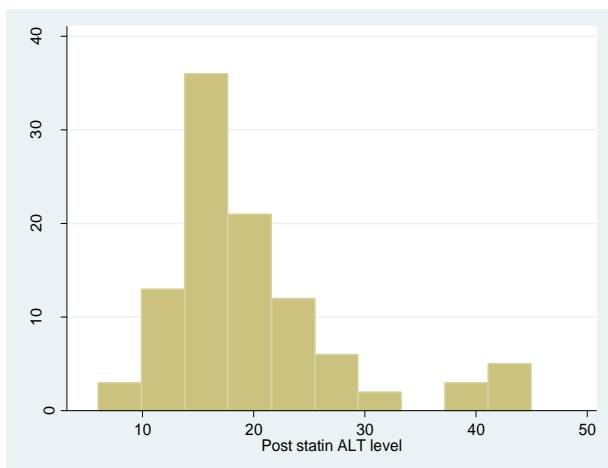

### Creatine Kinase levels post statin treatment (n=76)

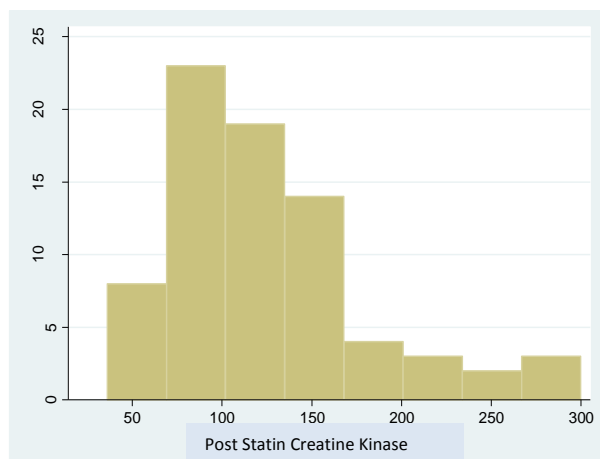

Supplement: archdischild-2015-308570supp.pdf [file archdischild-2015-308570supp.pdf]
